# Supplementary material for: Reciprocal sensitivity of diffuse large B-cell lymphoma cells to Bcl-2 inhibitors BIRD-2 versus venetoclax
Source: PubMed Central journal article supplement (PMC5762350; doi:10.18632/oncotarget.22898), 2017-12-04
Supplement: oncotarget-08-111656-s001.pdf [file oncotarget-08-111656-s001.pdf]

## Reciprocal sensitivity of diffuse large B-cell lymphoma cells to Bcl-2 inhibitors BIRD-2 versus venetoclax

### SUPPLEMENTARY MATERIALS

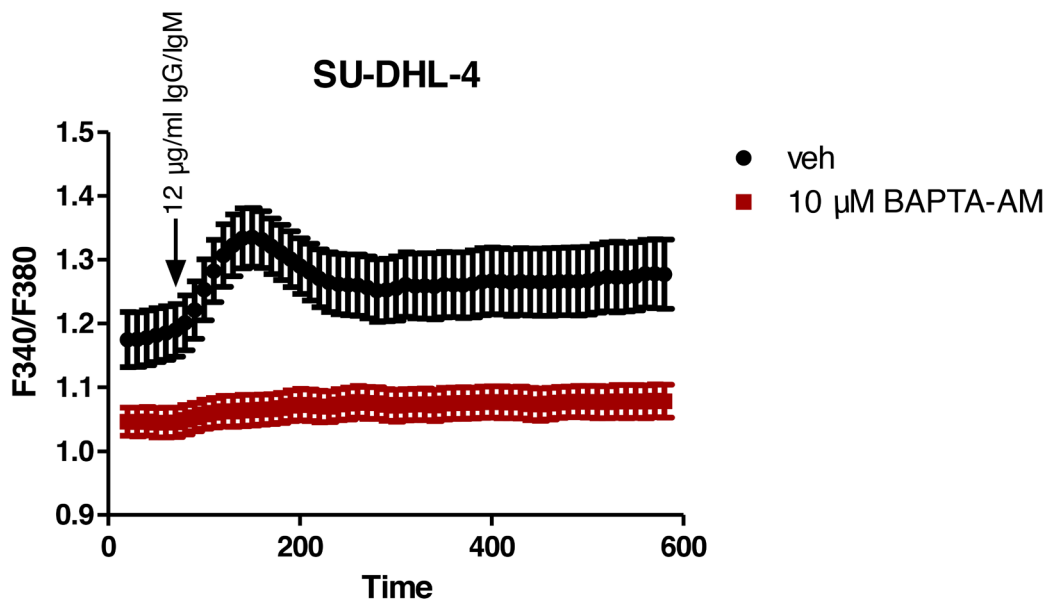

**Supplementary Figure 1: BAPTA-AM treatment effectively chelates intracellular  $\text{Ca}^{2+}$  in SU-DHL-4 cells.** Cytosolic  $\text{Ca}^{2+}$  measurements in Fura-2 AM-loaded SU-DHL-4 cells pretreated (red traces) or not (black traces) for 2 hours with 10  $\mu$ M BAPTA-AM. Agonist-induced  $\text{Ca}^{2+}$  release was triggered via the addition of the B-cell receptor agonist (12  $\mu$ g/ $\mu$ l anti-IgG/IgM) 60 seconds after the start of the measurement. Data represent average  $\pm$  SEM of triplicate samples of 4 independent experiments.

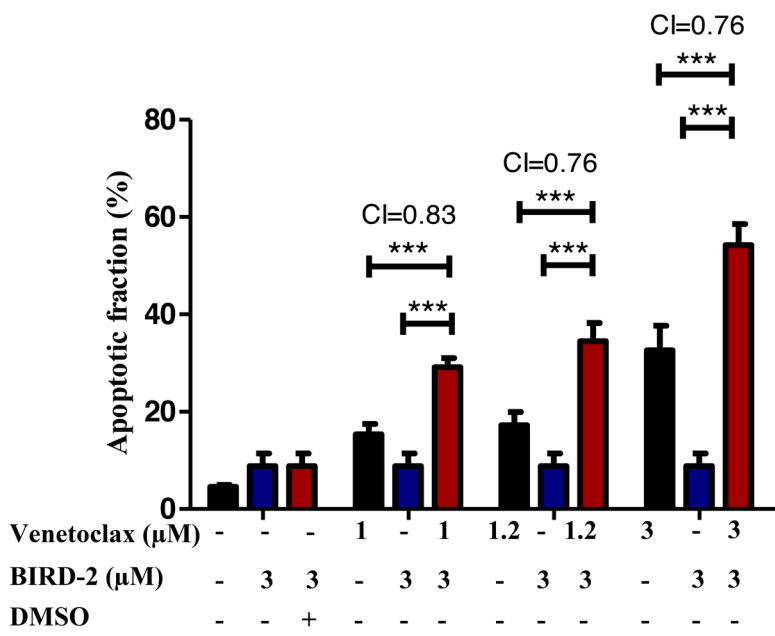

**Supplementary Figure 2: Synergistic effect of BIRD-2 and venetoclax in SU-DHL-4 cells.** SU-DHL-4 cells were treated for 24 hours of venetoclax alone (black bars), BIRD-2 alone (blue bars) or a combination of venetoclax/DMSO Ctrl (0.03%) and BIRD-2 (red bars). Cell death was measured using flow cytometry of Annexin V-FITC/7-AAD-stained cells and plotted as the BIRD-2- or venetoclax-induced apoptotic fraction. Similarly to Figure 8A the CI was calculated using the response additive method ( $CI = (E_{\text{venetoclax}} + E_{\text{BIRD-2}}) / E_{\text{venetoclax+BIRD-2}}$ ). Data are represented as average  $\pm$  SEM of N=5. Statistical significance was determined with a two-way ANOVA with a Bonferroni post-hoc test comparing  $E_{\text{venetoclax}}$  or  $E_{\text{BIRD-2}}$  with  $E_{\text{venetoclax+BIRD-2}}$  for the different venetoclax concentrations.
